# Supplementary material for: Serum metabolome and gut microbiome alterations are associated with low handgrip strength in older adults
Source: publisher site journal article supplement (doi:10.18632/aging.205501), 2024-02-01
Supplement: Supplementary file [file aging-v16i3-205501-supplementary-material-SD2.pdf]

SUPPLEMENTARY FIGURE

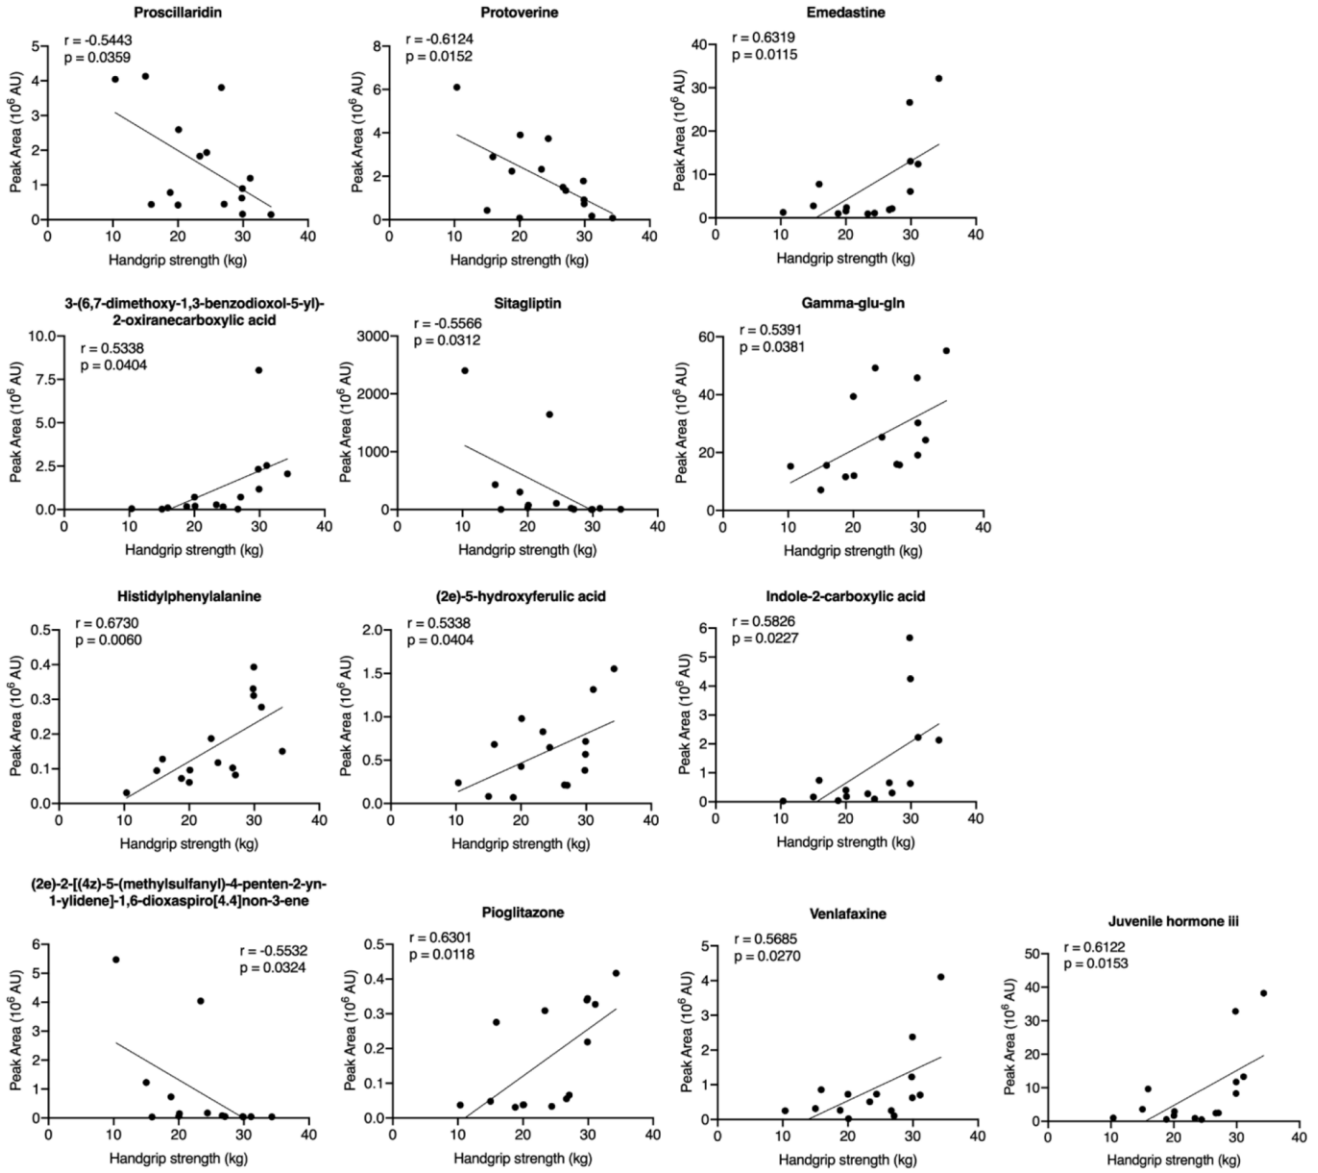

Supplementary Figure 1. Correlation analysis of the HGS value and differential metabolites in stool samples.
