# Supplementary material for: Serum metabolome and gut microbiome alterations are associated with low handgrip strength in older adults
Source: publisher site journal article supplement (doi:10.18632/aging.205501), 2024-02-01
Supplement: Supplementary file [file aging-v16i3-205501-supplementary-material-SD4.pdf]

## SUPPLEMENTARY TABLES

**Supplementary Table 2. Significantly enriched pathways of differential metabolites in serum samples between normal and low handgrip strength groups.**

| <b>Metabolism pathway</b>                           | <b>Differential metabolites</b>                                               |
|-----------------------------------------------------|-------------------------------------------------------------------------------|
| Protein digestion and absorption                    | Indole; P-cresol; L-proline                                                   |
| Phenylalanine, tyrosine and tryptophan biosynthesis | Indole                                                                        |
| Biosynthesis of unsaturated fatty acids             | 8z,11z,14z-eicosatrienoic acid; 11(z),14(z)-eicosadienoic acid; Linoleic acid |
| ABC transporters                                    | D-ribose; D-(-)-mannitol; L-proline                                           |
| Linoleic acid metabolism                            | 8z,11z,14z-eicosatrienoic acid; Linoleic acid                                 |
| Mineral absorption                                  | L-proline                                                                     |
| Pentose phosphate pathway                           | D-ribose                                                                      |
| Central carbon metabolism in cancer                 | L-proline                                                                     |
| Aminoacyl-tRNA biosynthesis                         | L-proline                                                                     |
| Fructose and mannose metabolism                     | D-(-)-mannitol                                                                |

**Supplementary Table 4. Significantly enriched pathways of differential metabolites in fecal samples between normal and low handgrip strength groups.**

| <b>Metabolism pathway</b>         | <b>Differential metabolites</b>                         |
|-----------------------------------|---------------------------------------------------------|
| Cholesterol metabolism            | Glycocholic acid; Glycochenodeoxycholate; Glycocholate  |
| Primary bile acid biosynthesis    | Glycocholic acid; Glycochenodeoxycholate                |
| Purine metabolism                 | Hypoxanthine; Inosine                                   |
| Bile secretion                    | Glycocholic acid; Glycochenodeoxycholate                |
| Pantothenate and CoA biosynthesis | Panthenol                                               |
| Tryptophan metabolism             | L-3-hydroxykynurenine; 3-(indol-3-yl)-2-oxobutyric acid |
| One carbon pool by folate         | Folinic acid                                            |
