# Supplementary material for: Serum metabolome and gut microbiome alterations are associated with low handgrip strength in older adults
Source: Aging (Albany NY). 2024 Feb 1;16(3):2638–56. doi: 10.18632/aging.205501 (PMC10911350; doi:10.18632/aging.205501)
Supplement: Supplementary Tables 1 and 3 [file aging-16-205501-s003.xlsx]

## Sheet: legend
Table	Description
Supplementary Table 1	Between-group metabolite differences in serum samples when comparing with low handgrip strength group.
Supplementary Table 2	Significantly enriched pathways of differential metabolites in serum samples between normal and low handgrip strength groups.
Supplementary Table 3	Between-group metabolite differences in fecal samples when comparing with low handgrip strength group.
Supplementary Table 4	Significantly enriched pathways of differential metabolites in fecal samples between normal and low handgrip strength groups.

## Sheet: Supplementary Table 1
	Supplementary Table 1. Between-group metabolite differences in serum samples when comparing with low handgrip strength group.
	Compound.ID	ratio (normal vs. low)	t.test_p.value	t.test_p.value_BHcorrect	wilcox.test_p.value	wilcox.test_p.value_BHcorrect	VIP	LCplatform	Name	Formula	Molecular.Weight	Actual.RT	KEGG.ID	mzCloud.ID..ChemSpider.ID	HMDB.ID	DeltaMass..Da.	DeltaMass..ppm.	mzVault.Best.Match	mzCloud.Best.Match	ChemSpider.Results	level	Super.class	Class	Sub.class	Family
Metabolites with class information increased in low handgrip strength group	0.657_150.0527	0.5142	0.0317	0.9135	0.0541	0.9761	1.4544	C18:neg	D-ribose	C5 H10 O5	150.053	0.657	C00121	BGI247	HMDB0000283	-1e-04	-0.6581	80	76.3	39	level1	Carbohydrates	Monosaccharides	Aldoses [Fig]	Carbohydrates
	10.069_306.2556	0.7291	0.0358	0.9135	0.0401	0.9761	1.0295	C18:neg	8z,11z,14z-eicosatrienoic acid	C20 H34 O2	306.256	10.069	C03242	MReference-349	HMDB0002925	-3e-04	-0.8554	NA	89.2	26	level2	Lipids and lipid-like molecules	Fatty Acyls	Fatty acids and conjugates	Fatty acyls[FA]
	10.326_308.2712	0.7012	0.0288	0.9135	0.0205	0.9761	1.1916	C18:neg	11(z),14(z)-eicosadienoic acid	C20 H36 O2	308.271	10.326	C16525	MReference-6815	HMDB0005060	-3e-04	-0.967	NA	83.7	11	level2	Lipids and lipid-like molecules	Fatty Acyls	Fatty acids and conjugates	Fatty acyls[FA]
	9.908_280.2399	0.7202	0.0451	0.9135	0.0721	0.9761	1.262	C18:neg	Linoleic acid	C18 H32 O2	280.24	9.908	C01595	MReference-2706	HMDB0000673	-3e-04	-1.0182	NA	97.9	87	level2	Lipids and lipid-like molecules	Fatty Acyls	Lineolic acids and derivatives	Fatty acyls[FA]
	0.712_182.079	0.3084	0.0219	0.9135	0.014	0.9761	2.0953	C18:neg	D-(-)-mannitol	C6 H14 O6	182.079	0.712	C00392	MReference-1527	HMDB0000765	-1e-04	-0.2899	39	42.7	7	level3	Organic oxygen compounds	Organooxygen compounds	Carbohydrates and carbohydrate conjugates	Carbohydrates
	5.672_446.2065	0.0527	0.0168	0.9135	0.0022	0.9761	2.6376	C18:neg	Olmesartan	C24 H26 N6 O3	446.207	5.672	C21543	S139674	HMDB0014420	-2e-04	-0.3893	NA	NA	1	level4	Benzenoids	Benzene and substituted derivatives	Biphenyls and derivatives	Benzene and derivatives
	3.473_297.0895	0.6893	0.0481	0.9444	0.0721	0.8225	1.0659	C18:pos	5'-methylthioadenosine	C11 H15 N5 O3 S	297.089	3.473	C00170	BGI135	HMDB0001173	0	-0.1467	96.5	96.4	2	level1	Nucleosides, nucleotides, and analogues	5'-deoxyribonucleosides	5'-deoxy-5'-thionucleosides	Nucleic acids and analogues
	11.149_164.0839	0.5629	0.049	0.9444	0.1206	0.9052	1.422	C18:pos	4-phenylbutyric acid	C10 H12 O2	164.084	11.149	C21793	MReference-3074	HMDB0000543	1e-04	0.7194	NA	32.8	54	level3	Benzenoids	Benzene and substituted derivatives	null	Benzene and derivatives
	9.958_282.2558	0.7256	0.0052	0.9262	0.0037	0.7634	1.339	C18:pos	Oleate	C18 H34 O2	282.256	9.958	C00712	BGI445	HMDB0000207	-1e-04	-0.2741	49.4	NA	32	level3	Lipids	Fatty acids [Fig]	Unsaturated fatty acids	Fatty acyls[FA]
	4.014_156.0424	0.2357	0.0444	0.9444	0.0541	0.8225	2.3461	C18:pos	2-methoxy-phloroglucinol	C7 H8 O4	156.042	4.014	NA	S3509032	HMDB0125077	2e-04	0.9714	NA	NA	16	level4	Benzenoids	Phenols	Methoxyphenols	Phenols and derivatives
	10.289_346.2869	0.5356	0.0105	0.9444	0.014	0.7731	1.7719	C18:pos	Cetyl benzoate	C23 H38 O2	346.287	10.289	NA	S9726744	HMDB0094685	-3e-04	-0.7508	NA	NA	10	level4	Benzenoids	Benzene and substituted derivatives	Benzoic acids and derivatives	Benzene and derivatives
	10.276_363.3135	0.5567	0.0114	0.9444	0.014	0.7731	1.7235	C18:pos	Terminaline	C23 H41 N O2	363.313	10.276	C10825	S154583	NA	-3e-04	-0.7182	NA	NA	1	level4	Alkaloids	Alkaloids derived by amination reactions	Steroid alkaloids	Alkaloids
	9.951_349.298	0.636	0.0459	0.9444	0.0721	0.8225	1.4519	C18:pos	N-homo-?-linolenoylethanolamine	C22 H39 N O2	349.298	9.951	C13828	S4445443	HMDB0013625	-1e-04	-0.3256	NA	NA	2	level4	Organic nitrogen compounds	Organonitrogen compounds	Amines	Amines
	3.157_125.0842	0.7515	0.0412	0.9444	0.0289	0.7731	1.1349	C18:pos	2-ethyl-4,5-dimethylthiazole	C7 H11 N O	125.084	3.157	NA	S55906	HMDB0037865	1e-04	0.8878	NA	NA	12	level4	Organoheterocyclic compounds	Azoles	Oxazoles	Oxazoles
Metabolites without class information increased in low handgrip strength group	0.73_240.022	0.6553	0.0265	0.9135	0.0205	0.9761	1.2062	C18:neg	Methacrifos	C7 H13 O5 P S	240.022	0.73	C18745	S2298886	NA	-1e-04	-0.4725	NA	NA	1	level4	NA	NA	NA	NA
	0.723_162.0059	0.6274	0.0283	0.9135	0.014	0.9761	1.2272	C18:neg	2-chloro-1-ethoxy-1,1,2-trifluoroethane	C4 H6 Cl F3 O	162.006	0.723	C14700	S119928	NA	0	0.0672	NA	NA	1	level4	NA	NA	NA	NA
	0.629_169.9885	0.6085	0.0214	0.9135	0.0205	0.9761	1.3006	C18:neg	3-sulfolactic acid	C3 H6 O6 S	169.988	0.629	C16069	S570835	NA	0	-0.0907	NA	NA	6	level4	NA	NA	NA	NA
	10.216_332.2713	0.6529	0.03	0.9135	0.0289	0.9761	1.3266	C18:neg	(7e,10e,13e,16e)-7,10,13,16-docosatetraenoic acid	C22 H36 O2	332.271	10.216	NA	S4445971	NA	-2e-04	-0.6286	NA	NA	11	level4	NA	NA	NA	NA
	9.905_464.2981	0.5823	0.0367	0.9135	0.0401	0.9761	1.4275	C18:neg	(3r,5s)-3-[(e)-{(1r,3as,7ar)-1-[(2r)-6-hydroxy-6-methyl-2-heptanyl]-7a-methyloctahydro-4h-inden-4-ylidene}methyl]-1,3,4,5,6,7-hexahydro-2-benzothiophene-5-ol 2,2-dioxide	C27 H44 O4 S	464.298	9.905	NA	S7826382	NA	0.0021	4.4159	NA	NA	2	level4	NA	NA	NA	NA
	0.729_115.0634	0.7014	0.0197	0.9444	0.0205	0.7731	1.2796	C18:pos	L-proline	C5 H9 N O2	115.063	0.729	C16435	BGI376	NA	1e-04	0.7646	92.7	89.4	6	level1	NA	NA	NA	NA
	11.783_733.5616	0.5553	0.0343	0.9444	0.0541	0.8225	1.4321	C18:pos	Dl-dipalmitoylphosphatidylcholine	C40 H80 N O8 P	733.562	11.783	NA	MReference-889	NA	-5e-04	-0.6987	NA	90.1	21	level2	NA	NA	NA	NA
	11.189_702.5671	0.6211	0.0196	0.9444	0.0093	0.7731	1.4024	C18:pos	Palmitoyl sphingomyelin	C39 H79 N2 O6 P	702.567	11.189	NA	MReference-4865	NA	-5e-04	-0.6931	NA	85.8	2	level2	NA	NA	NA	NA
	10.028_362.1905	0.5927	0.0245	0.9444	0.014	0.7731	1.6674	C18:pos	17,21-epoxy-9-fluoro-11beta-hydroxyprogesterone	C21 H27 F O4	362.19	10.028	C15309	S210391	NA	0.0012	3.219	NA	NA	1	level4	NA	NA	NA	NA
	9.856_306.2558	0.6344	0.0162	0.9444	0.0289	0.7731	1.5345	C18:pos	Eicosa-8,11,14-trienoic acid	C20 H34 O2	306.256	9.856	NA	S4445953	NA	-1e-04	-0.2466	NA	NA	26	level4	NA	NA	NA	NA
	9.643_338.1768	0.6823	0.0228	0.9444	0.0541	0.8225	1.323	C18:pos	1,1'-dibenzyl-4,4'-bipyridinium	C24 H22 N2	338.177	9.643	C00915	S13567	NA	-0.0015	-4.3254	NA	NA	1	level4	NA	NA	NA	NA
Metabolites with class information decreased in low handgrip strength group	4.458_205.0737	5.6479	0.0279	0.9135	0.0289	0.9761	2.4391	C18:neg	Cinnamoylglycine	C11 H11 N O3	205.074	4.458	NA	MReference-345	HMDB0011621	-2e-04	-0.8769	NA	92.4	8	level2	Organic acids and derivatives	Carboxylic acids and derivatives	Amino acids, peptides, and analogues	Amino acids, peptides, and analogues
	8.274_499.9367	2.1888	0.0275	0.9135	0.0721	0.9761	1.8516	C18:neg	Perfluorooctanesulfonic acid	C8 H F17 O3 S	499.937	8.274	C18142	S67068	HMDB0059586	-8e-04	-1.6548	NA	NA	1	level4	Organohalogen compounds	Alkyl halides	Alkyl fluorides	Alkyl fluorides
	8.598_513.9666	2.6075	0.0318	0.9135	0.0541	0.9761	2.0055	C18:neg	Perfluorocapric acid	C10 H F19 O2	513.967	8.598	NA	S9181	HMDB0061738	-7e-04	-1.4333	NA	NA	1	level4	Organohalogen compounds	Alkyl halides	Alkyl fluorides	Alkyl fluorides
	5.95_240.0995	3.2751	0.017	0.9135	0.0205	0.9761	2.1464	C18:neg	3,4,5-trimethoxyhydrocinnamic acid	C12 H16 O5	240.1	5.95	NA	S58390	HMDB0030254	-3e-04	-1.1893	NA	NA	12	level4	Phenylpropanoids and polyketides	Phenylpropanoic acids	null	Phenylpropanoic acids
	5.951_196.1099	3.4118	0.0164	0.9135	0.0289	0.9761	2.2257	C18:neg	Hexyl 2-furoate	C11 H16 O3	196.11	5.951	NA	S55834	HMDB0037725	-1e-04	-0.4252	NA	NA	4	level4	Organoheterocyclic compounds	Furans	Furoic acid and derivatives	Furoic acid and derivatives
	5.947_325.0771	3.2465	0.0174	0.9135	0.0289	0.9761	2.2418	C18:neg	Midazolam	C18 H13 Cl F N3	325.077	5.947	C07524	S4047	HMDB0014821	-0.0011	-3.3217	NA	NA	1	level4	Organoheterocyclic compounds	Benzodiazepines	1,4-benzodiazepines	1,4-benzodiazepines
	8.869_563.9645	2.9204	0.0115	0.9135	0.0289	0.9761	2.3568	C18:neg	Pfunda	C11 H F21 O2	563.965	8.869	NA	S69649	HMDB0061743	4e-04	0.6734	NA	NA	1	level4	Organohalogen compounds	Alkyl halides	Alkyl fluorides	Alkyl fluorides
	3.804_179.0584	4.7869	0.0447	0.9444	0.0721	0.8225	2.3969	C18:pos	Hippurate	C9 H9 N O3	179.058	3.804	C01586	BGI309	HMDB0000714	1e-04	0.6802	91.9	91.6	8	level1	Benzenoids	Benzene and substituted derivatives	Benzoic acids and derivatives	Benzene and derivatives
	7.636_285.1365	2.0445	0.0304	0.9444	0.0541	0.8225	3.3056	C18:pos	Piperine	C17 H19 N O3	285.137	7.636	C03882	MReference-969	HMDB0029377	0	-0.137	NA	94.4	17	level2	Alkaloids and derivatives	null	null	Alkaloids and derivatives
	5.438_178.0631	3.7222	0.0012	0.8278	0.0022	0.7634	2.8023	C18:pos	4-methoxycinnamic acid	C10 H10 O3	178.063	5.438	NA	MReference-3427	HMDB0002040	1e-04	0.3504	NA	79.2	33	level2	Phenylpropanoids and polyketides	Cinnamic acids and derivatives	Cinnamic acids	Polyketides[PK]
	8.525_282.1467	2.2818	0.033	0.9444	0.0401	0.7907	1.8404	C18:pos	Artemisinin	C15 H22 O5	282.147	8.525	C09538	MReference-6160	NA	0	-0.0779	NA	65.3	12	level2	Terpenoids	Sesquiterpenoids (C15)	Others	Terpenoids
	8.713_499.2967	6.469	0.0403	0.9444	0.0541	0.8225	2.6469	C18:pos	Taurodeoxycholic acid	C26 H45 N O6 S	499.297	8.713	NA	MReference-9772	HMDB0000896	0	-0.0495	NA	41.8	4	level3	Lipids and lipid-like molecules	Steroids and steroid derivatives	Bile acids, alcohols and derivatives	Bile acids, alcohols and derivatives
	3.327_117.0579	1.4261	0.046	0.9444	0.0541	0.8225	1.4122	C18:pos	Indole	C8 H7 N	117.058	3.327	C00463	MReference-444	HMDB0000738	1e-04	0.6165	NA	42	2	level3	Organoheterocyclic compounds	Indoles and derivatives	Indoles	Indoles
	5.437_534.1715	7.5538	0.0082	0.9444	0.0093	0.7731	3.3058	C18:pos	Dalpanin	C26 H30 O12	534.172	5.437	C10416	S391109	NA	-0.0022	-4.1772	NA	NA	4	level4	Flavonoids	Isoflavonoids	Isoflavanones	Flavonoids
	7.648_307.1183	2.1339	0.032	0.9444	0.0541	0.8225	2.8859	C18:pos	2-cyano-3-(3,4-dihydroxy-5-nitrophenyl)-n,n-diethylpropanamide	C14 H17 N3 O5	307.118	7.648	NA	S74854201	HMDB0142220	0.0015	4.7284	NA	NA	1	level4	Benzenoids	Phenols	Nitrophenols	Phenols and derivatives
	0.733_171.126	4.4169	0.0086	0.9444	0.0093	0.7731	2.7875	C18:pos	Gabapentin	C9 H17 N O2	171.126	0.733	C07018	S3328	HMDB0005015	0	0.2902	NA	NA	1	level4	Organic acids and derivatives	Carboxylic acids and derivatives	Amino acids, peptides, and analogues	Amino acids, peptides, and analogues
	5.438_294.0507	3.51	0.007	0.9444	0.014	0.7731	2.673	C18:pos	Dimethyl [(e)-(1-methoxy-2-oxo-1,2-dihydro-3h-indol-3-ylidene)methyl]carbonodithioimidate	C13 H14 N2 O2 S2	294.051	5.438	NA	S23188712	HMDB0034765	0.001	3.3211	NA	NA	3	level4	Organoheterocyclic compounds	Indoles and derivatives	null	Indole and derivatives
	5.438_238.0841	3.334	0.002	0.8278	0.0059	0.7634	2.6435	C18:pos	(e)-3,4,5-trimethoxycinnamic acid	C12 H14 O5	238.084	5.438	NA	S642910	HMDB0002511	0	0.1291	NA	NA	7	level4	Phenylpropanoids and polyketides	Cinnamic acids and derivatives	Hydroxycinnamic acids and derivatives	Polyketides[PK]
	5.437_192.0787	2.753	0.0034	0.8278	0.0059	0.7634	2.4046	C18:pos	Af4878000	C11 H12 O3	192.079	5.437	NA	S6902	HMDB0040268	0	0.2546	NA	NA	30	level4	Organic oxygen compounds	Organooxygen compounds	Carbonyl compounds	Carbonyl compounds
	3.804_108.0576	4.369	0.0446	0.9444	0.0721	0.8225	2.3622	C18:pos	P-cresol	C7 H8 O	108.058	3.804	C01468	S13839082	HMDB0001858	1e-04	1.1919	NA	NA	5	level4	Benzenoids	Phenols	Cresols	Phenols and derivatives
	7.28_236.1049	3.2793	0.0169	0.9444	0.0205	0.7731	2.3553	C18:pos	Ethyl vanillin isobutyrate	C13 H16 O4	236.105	7.28	NA	S586073	HMDB0037683	1e-04	0.2641	NA	NA	5	level4	Benzenoids	Phenol esters	null	Benzene and derivatives
	4.843_224.0685	3.1735	0.0175	0.9444	0.014	0.7731	2.3287	C18:pos	Sinapinic acid	C11 H12 O5	224.069	4.843	C00482	S553361	HMDB0032616	0	-0.0239	NA	NA	19	level4	Phenylpropanoids and polyketides	Cinnamic acids and derivatives	Hydroxycinnamic acids and derivatives	Polyketides[PK]
	7.279_254.1155	3.1141	0.0154	0.9444	0.0289	0.7731	2.3139	C18:pos	Hostmaniane	C13 H18 O5	254.115	7.279	NA	S9359446	HMDB0032796	0	0.1319	NA	NA	2	level4	Benzenoids	Benzene and substituted derivatives	Benzoic acids and derivatives	Benzene and derivatives
	7.28_222.0893	3.1522	0.018	0.9444	0.0289	0.7731	2.3051	C18:pos	Diethyl phthalate	C12 H14 O4	222.089	7.28	C14175	S13837303	HMDB0094660	1e-04	0.3249	NA	NA	24	level4	Benzenoids	Benzene and substituted derivatives	Benzoic acids and derivatives	Benzene and derivatives
	7.283_285.1576	3.7005	0.022	0.9444	0.0541	0.8225	2.2962	C18:pos	3-[2-(dimethylamino)ethyl]-5-(1h-1,2,4-triazol-1-ylmethyl)-1h-indol-6-ol	C15 H19 N5 O	285.158	7.283	NA	S9916828	HMDB0060847	-0.0014	-4.9494	NA	NA	1	level4	Organoheterocyclic compounds	Indoles and derivatives	Tryptamines and derivatives	Amines and derivatives
	7.28_180.0787	3.1026	0.0177	0.9444	0.0289	0.7731	2.2738	C18:pos	Propylparaben	C10 H12 O3	180.079	7.28	NA	S6907	HMDB0032574	1e-04	0.5438	NA	NA	38	level4	Benzenoids	Benzene and substituted derivatives	Benzoic acids and derivatives	Benzene and derivatives
	6.786_166.0632	3.2582	0.035	0.9444	0.0289	0.7731	2.1207	C18:pos	Desaminotyrosine	C9 H10 O3	166.063	6.786	C01744	S9965	HMDB0002199	2e-04	1.3542	NA	NA	44	level4	Phenylpropanoids and polyketides	Phenylpropanoic acids	null	Phenylpropanoic acids
	6.784_208.0737	3.2504	0.0426	0.9444	0.0401	0.7907	2.1183	C18:pos	(2e)-3-(3,4-dimethoxyphenyl)acrylic acid	C11 H12 O4	208.074	6.784	NA	S626174	HMDB0034315	2e-04	0.8339	NA	NA	23	level4	Phenylpropanoids and polyketides	Cinnamic acids and derivatives	Hydroxycinnamic acids and derivatives	Polyketides[PK]
	7.277_340.0245	2.3285	0.0296	0.9444	0.0401	0.7907	2.0051	C18:pos	(3e)-4-(7-methoxy-2-oxo-2h-chromen-6-yl)-2-oxo-3-buten-1-yl hydrogen sulfate	C14 H12 O8 S	340.024	7.277	NA	S74852403	HMDB0128972	-8e-04	-2.4509	NA	NA	1	level4	Phenylpropanoids and polyketides	Coumarins and derivatives	null	Coumarins and derivatives
	7.28_310.0726	2.2165	0.0277	0.9444	0.0289	0.7731	1.9331	C18:pos	Sulfadimethoxine	C12 H14 N4 O4 S	310.073	7.28	NA	S5132	HMDB0015621	-9e-04	-3.0503	NA	NA	2	level4	Benzenoids	Benzene and substituted derivatives	Benzenesulfonamides	Benzene and derivatives
	8.526_296.1624	2.2566	0.0412	0.9444	0.0721	0.8225	1.8119	C18:pos	4-hydroxy-5-methoxy-4-[2-methyl-3-(3-methyl-2-buten-1-yl)-2-oxiranyl]-1-oxaspiro[2.5]octan-6-one	C16 H24 O5	296.162	8.526	C09674	S251178	HMDB0038120	0	6e-04	NA	NA	4	level4	Organic oxygen compounds	Organooxygen compounds	Alcohols and polyols	Alcohols
	8.526_222.1256	2.2497	0.0389	0.9444	0.0721	0.8225	1.8047	C18:pos	2453103	C13 H18 O3	222.126	8.526	NA	S21212	HMDB0061943	0	-0.0137	NA	NA	14	level4	Benzenoids	Benzene and substituted derivatives	Benzoic acids and derivatives	Benzene and derivatives
	9.49_412.2978	1.3984	0.0434	0.9444	0.0939	0.8466	1.32	C18:pos	Virilon	C27 H40 O3	412.298	9.49	C08156	S390140	NA	0	0.0755	NA	NA	19	level4	ST Sterol Lipids	ST02 Steroids	ST0202 C19 steroids (androgens) and derivatives	Sterol lipids[ST]
Metabolites without class information decreased in low handgrip strength group	7.385_336.1183	1.6639	0.0403	0.9135	0.0541	0.9761	1.2956	C18:neg	3-epi-3-hydroxymugineic acid	C12 H20 N2 O9	336.118	7.385	C15501	S9122896	NA	0.0014	4.1015	NA	NA	1	level4	NA	NA	NA	NA
	5.954_308.0869	2.088	0.0299	0.9135	0.0401	0.9761	1.6954	C18:neg	Clobenpropit	C14 H17 Cl N4 S	308.087	5.954	C17934	S2688	NA	7e-04	2.2161	NA	NA	1	level4	NA	NA	NA	NA
	7.636_285.1365	2.0445	0.0304	0.9444	0.0541	0.8225	3.3056	C18:pos	Piperine	C17 H19 N O3	285.137	7.636	C03882	MReference-969	HMDB0029377	0	-0.137	NA	94.4	17	level2	Alkaloids and derivatives	null	null	Alkaloids and derivatives
	8.458_415.3084	3.3128	0.0302	0.9444	0.0205	0.7731	3.0604	C18:pos	Myxalamid a	C26 H41 N O3	415.308	8.458	C12158	S10128295	NA	-2e-04	-0.5164	NA	NA	1	level4	NA	NA	NA	NA
	7.281_518.1466	4.3933	0.018	0.9444	0.0289	0.7731	2.8083	C18:pos	(2xi)-2-({[1-(4-chlorobenzoyl)-5-methoxy-2-methyl-1h-indol-3-yl]acetyl}amino)-2-deoxy-d-arabino-hexose	C25 H27 Cl N2 O8	518.147	7.281	NA	S30791483	NA	0.001	1.9298	NA	NA	1	level4	NA	NA	NA	NA
	0.734_187.1209	3.6194	0.0264	0.9444	0.0205	0.7731	2.2148	C18:pos	Pivagabine	C9 H17 N O3	187.121	0.734	NA	S62118	NA	1e-04	0.5509	NA	NA	4	level4	NA	NA	NA	NA
	7.792_276.0974	3.0591	0.0376	0.9444	0.0721	0.8225	2.1422	C18:pos	Vv4325500	C18 H16 O Si	276.097	7.792	C14549	S63119	NA	4e-04	1.3634	NA	42	1	level4	NA	NA	NA	NA
	7.281_326.0453	2.4107	0.026	0.9444	0.0401	0.7907	2.0302	C18:pos	(3e)-4-(7-methoxy-2-oxo-2h-chromen-6-yl)-3-buten-2-yl hydrogen sulfate	C14 H14 O7 S	326.045	7.281	NA	S74852404	NA	-7e-04	-2.1576	NA	NA	2	level4	NA	NA	NA	NA
	8.12_268.1312	2.094	0.0121	0.9444	0.0289	0.7731	1.924	C18:pos	Ripazepam	C15 H16 N4 O	268.131	8.12	C19518	S30896	NA	-0.0012	-4.5978	NA	NA	3	level4	NA	NA	NA	NA

## Sheet: Supplementary Table 3
	Supplementary Table 3. Between-group metabolite differences in fecal samples when comparing with low handgrip strength group.
	Compound.ID	ratio	t.test_p.value	t.test_p.value_BHcorrect	wilcox.test_p.value	wilcox.test_p.value_BHcorrect	VIP	LCplatform	Name	Formula	Molecular.Weight	Actual.RT	KEGG.ID	mzCloud.ID..ChemSpider.ID	HMDB.ID	DeltaMass..Da.	DeltaMass..ppm.	mzVault.Best.Match	mzCloud.Best.Match	ChemSpider.Results	level	Super.class	Class	Sub.class	Family
Metabolites with class information increased in low handgrip strength group	5.226_456.1052	0.0242	0.0446	0.7089	0.0293	0.6399	1.4469	C18:neg	(-)-ecg-3''-o-me	C23 H20 O10	456.105	5.226	NA	S410661	HMDB0037945	-5e-04	-1.0295	NA	NA	3	level4	Phenylpropanoids and polyketides	Flavonoids	Flavonoid glycosides	Flavonoids
	10.161_394.1778	0.1733	0.008	0.7089	0.0047	0.5877	1.6795	C18:neg	1,3,8-trihydroxy-4-methyl-2,7-bis(3-methyl-2-buten-1-yl)-9h-xanthen-9-one	C24 H26 O5	394.178	10.161	NA	S30777181	HMDB0037298	-2e-04	-0.4678	NA	NA	2	level4	Organoheterocyclic compounds	Benzopyrans	1-benzopyrans	1-benzopyrans
	10.412_358.2869	0.1135	0.0044	0.7089	0.0127	0.6399	1.7322	C18:neg	1-phenyl-1,3-octadecanedione	C24 H38 O2	358.287	10.412	NA	S78501	HMDB0035583	-2e-04	-0.6716	NA	NA	15	level4	Organic oxygen compounds	Organooxygen compounds	Carbonyl compounds	Carbonyl compounds
	4.428_238.1203	0.0533	0.0287	0.7089	0.0426	0.6399	1.8418	C18:neg	2444643wxk	C13 H18 O4	238.12	4.428	NA	S536429	HMDB0034046	-2e-04	-0.912	NA	NA	3	level4	Benzenoids	Phenol ethers	Anisoles	Benzene and derivatives
	9.005_606.2451	0.0367	0.0437	0.7089	0.0593	0.6399	1.4163	C18:neg	3-[14-ethyl-13-formyl-21-(methoxycarbonyl)-4,8,18-trimethyl-20-oxo-9-vinyl-3-phorbinyl]propanoic acid	C35 H34 N4 O6	606.245	9.005	NA	S35013325	HMDB0031149	-0.0028	-4.5609	NA	NA	1	level4	Organoheterocyclic compounds	Tetrapyrroles and derivatives	Chlorins	Chlorins
	7.099_373.1095	0.0099	0.0396	0.7089	0.0593	0.6399	1.575	C18:neg	5-hydroxy rosiglitazone	C18 H19 N3 O4 S	373.11	7.099	NA	S8040009	HMDB0060981	-1e-04	-0.3931	NA	NA	2	level4	Benzenoids	Phenol ethers	null	Benzene and derivatives
	5.843_202.063	0.3258	0.0155	0.7089	0.0027	0.5532	1.0579	C18:neg	Beta-naphthoxyacetic acid	C12 H10 O3	202.063	5.843	C18750	S8115	HMDB0032706	0	-0.1888	NA	NA	5	level4	Benzenoids	Benzene and substituted derivatives	Phenoxyacetic acid derivatives	Benzene and derivatives
	10.523_334.2869	0.2268	0.0346	0.7089	0.0426	0.6399	1.6903	C18:neg	Docosatrienoic acid	C22 H38 O2	334.287	10.523	NA	MReference-6879	HMDB0002823	-3e-04	-0.9028	NA	81.9	10	level2	Lipids and lipid-like molecules	Fatty Acyls	Fatty acids and conjugates	Fatty acyls[FA]
	0.726_414.1371	0.0821	0.0056	0.7089	0.0027	0.5532	1.6813	C18:neg	Flecainide	C17 H20 F6 N2 O3	414.137	0.726	C07001	S3239	HMDB0015326	-7e-04	-1.7221	NA	NA	4	level4	Benzenoids	Benzene and substituted derivatives	Benzoic acids and derivatives	Benzene and derivatives
	8.347_449.3138	0.0947	0.0427	0.7089	0.0593	0.6399	1.5586	C18:neg	Glycochenodeoxycholate	C26 H43 N O5	449.314	8.347	C05466	BGI629	HMDB0000637	-3e-04	-0.6721	97.2	86.8	6	level2	ST Sterol Lipids	ST04 Bile acids and derivatives	ST0402 C26 bile acids, alcohols, and derivatives	Sterol lipids[ST]
	7.88_465.3086	0.0592	0.0061	0.7089	0.008	0.6399	2.2936	C18:neg	Glycocholic acid	C26 H43 N O6	465.309	7.88	C01921	MReference-429	HMDB0000138	-4e-04	-0.8975	NA	89.2	4	level2	Lipids and lipid-like molecules	Steroids and steroid derivatives	Bile acids, alcohols and derivatives	Bile acids, alcohols and derivatives
	6.03_450.1202	0.0489	0.0157	0.7089	0.0293	0.6399	1.6489	C18:neg	Icia5682	C24 H22 Cl F3 O3	450.12	6.03	NA	S77681	HMDB0039360	-7e-04	-1.6319	NA	NA	1	level4	Benzenoids	Benzene and substituted derivatives	Diphenylethers	Benzene and derivatives
	7.075_426.2077	0.121	0.0199	0.7089	0.02	0.6399	1.9754	C18:neg	Paliperidone	C23 H27 F N4 O3	426.208	7.075	C21516	S103109	HMDB0015396	0.001	2.3025	NA	NA	1	level4	Organoheterocyclic compounds	Pyridopyrimidines	null	Pyridopyrimidines
	7.728_530.2903	0.2638	0.0241	0.7089	0.0426	0.6399	1.2696	C18:neg	Proscillaridin	C30 H42 O8	530.29	7.728	C12816	S4447658	NA	0.0023	4.4118	NA	NA	4	level4	Steroids	24-Carbon atoms	Bufanolide derivatives [Fig]	Sterol lipids[ST]
	3.399_434.1211	0.1598	0.0135	0.7089	0.0293	0.6399	1.7027	C18:neg	Prunin	C21 H22 O10	434.121	3.399	C09099	S83766	NA	-2e-04	-0.5067	NA	NA	9	level4	Flavonoids	Flavonoids	Flavanones	Flavonoids
	7.395_398.2125	0.1396	0.0064	0.7089	0.0127	0.6399	2.1982	C18:neg	Sunitinib	C22 H27 F N4 O2	398.212	7.395	NA	S4486264	HMDB0015397	7e-04	1.7275	NA	NA	1	level4	Organoheterocyclic compounds	Indoles and derivatives	Indolines	Indole and derivatives
	7.344_478.3771	0.0148	0.0182	0.705	0.0027	0.4678	1.8648	C18:pos	(+)-carpaine	C28 H50 N2 O4	478.377	7.344	C10135	S390994	HMDB0030272	0	0.0753	NA	NA	2	level4	Alkaloids	Alkaloids derived from lysine	Piperidine alkaloids	Alkaloids
	4.795_234.0724	0.0313	0.0161	0.705	0.02	0.5327	2.0658	C18:pos	(2e)-2-[(4z)-5-(methylsulfanyl)-4-penten-2-yn-1-ylidene]-1,6-dioxaspiro[4.4]non-3-ene	C13 H14 O2 S	234.072	4.795	NA	S10275812	HMDB0032660	0.001	4.0776	NA	NA	1	level4	Organic oxygen compounds	Organooxygen compounds	Ethers	Ethers
	4.807_426.095	0.0274	0.0272	0.705	0.0426	0.563	1.8684	C18:pos	(2r,3r)-5,7-dihydroxy-2-(4-hydroxyphenyl)-3,4-dihydro-2h-chromen-3-yl 3,4,5-trihydroxybenzoate	C22 H18 O9	426.095	4.807	NA	S410660	HMDB0038846	-1e-04	-0.221	NA	NA	1	level4	Phenylpropanoids and polyketides	Flavonoids	Flavans	Flavonoids
	7.337_426.179	0.1747	0.0425	0.705	0.008	0.5327	1.2227	C18:pos	(3z)-3-({6-[2-(dimethylamino)ethyl]-4-methoxy-1,3-benzodioxol-5-yl}methylene)-6,7-dimethoxy-1-isoindolinone	C23 H26 N2 O6	426.179	7.337	NA	S4573058	HMDB0030378	-1e-04	-0.1964	NA	NA	1	level4	Organoheterocyclic compounds	Isoindoles and derivatives	Isoindolines	Indole and derivatives
	7.534_420.1463	0.1167	0.0248	0.705	0.0127	0.5327	1.6723	C18:pos	1'-methoxy-3,3'-dimethyl-1h,9'h-2,4'-bicarbazole-1,4(9h)-dione	C27 H20 N2 O3	420.146	7.534	NA	S8607691	HMDB0040789	-0.0011	-2.5333	NA	NA	1	level4	Organoheterocyclic compounds	Indoles and derivatives	Carbazoles	Indole and derivatives
	7.372_212.1565	0.1044	0.0369	0.705	0.1419	0.6347	1.5036	C18:pos	2,6-di-iso-propylnaphthalene	C16 H20	212.156	7.372	NA	S29899	HMDB0059902	0	0.1939	NA	NA	1	level4	Benzenoids	Naphthalenes	null	Benzene and derivatives
	8.258_527.3613	0.0421	0.0321	0.705	0.0593	0.5712	1.7243	C18:pos	23-(1,4-dimethyl-2,8-dioxabicyclo[3.2.1]oct-4-yl)-23-oxodaphnan-22-yl acetate	C32 H49 N O5	527.361	8.258	NA	S35013174	HMDB0030291	2e-04	0.3417	NA	NA	1	level4	Alkaloids and derivatives	Daphniphylline-type alkaloids	null	Alkaloids and derivatives
	1.066_352.1301	0.1803	0.0426	0.705	0.0593	0.5712	1.7847	C18:pos	5-hydroxy-3-(4-hydroxyphenyl)-7-methoxy-6-(3-methyl-2-buten-1-yl)-4h-chromen-4-one	C21 H20 O5	352.13	1.066	NA	S421862	HMDB0038480	-9e-04	-2.6399	NA	NA	18	level4	Phenylpropanoids and polyketides	Isoflavonoids	Isoflavans	Flavonoids
	1.02_71.0371	0.3391	0.0248	0.705	0.0593	0.5712	1.2363	C18:pos	6185892	C3 H5 N O	71.0371	1.02	C01659	S6331	HMDB0004296	0	0.5009	NA	NA	1	level4	Organic acids and derivatives	Carboximidic acids and derivatives	Carboximidic acids	Organic acids
	7.327_283.1784	0.3989	0.0296	0.705	0.0593	0.5712	1.0581	C18:pos	6571082	C15 H25 N O4	283.178	7.327	NA	S102899	HMDB0060994	1e-04	0.2284	NA	NA	3	level4	Benzenoids	Phenol ethers	null	Benzene and derivatives
	5.933_454.199	0.262	0.044	0.705	0.0813	0.603	1.2605	C18:pos	Deoxylimonin	C26 H30 O7	454.199	5.933	NA	MReference-3494	HMDB0035031	-1e-04	-0.2887	NA	60.7	6	level2	Lipids and lipid-like molecules	Steroids and steroid derivatives	Steroid lactones	Steroids and derivatives
	0.758_172.0735	0.2321	0.0188	0.705	0.02	0.5327	1.7692	C18:pos	Diacetyl	C4 H6 O2	172.073	0.758	C00741	BGI231	HMDB0003407	86.0367	999999.1731	54.2	NA	7	level3	Organic oxygen compounds	Organooxygen compounds	Carbonyl compounds	Carbonyl compounds
	9.962_349.298	0.1876	0.0177	0.705	0.02	0.5327	1.4304	C18:pos	Dihomo-γ-linolenoyl ethanolamide	C22 H39 N O2	349.298	9.962	C13828	MReference-9757	HMDB0013625	-1e-04	-0.3559	NA	62.6	2	level2	Organic nitrogen compounds	Organonitrogen compounds	Amines	Amines
	3.164_473.166	0.1987	0.0456	0.705	0.0593	0.5712	2.0744	C18:pos	Folinic acid	C20 H23 N7 O7	473.166	3.164	C03479	S140	HMDB0001562	1e-04	0.1717	NA	NA	6	level4	Organoheterocyclic compounds	Pteridines and derivatives	Pterins and derivatives	Pteridines and derivatives
	7.963_465.309	0.0845	0.0203	0.705	0.02	0.5327	1.7896	C18:pos	Glycocholate	C26 H43 N O6	465.309	7.963	C01921	BGI295	HMDB0000138	-1e-04	-0.1088	86.7	NA	4	level2	Steroids	24-Carbon atoms	Cholane derivatives [Fig]	Sterol lipids[ST]
	3.915_254.1154	0.0315	0.0185	0.705	0.0293	0.5368	1.9669	C18:pos	Hostmaniane	C13 H18 O5	254.115	3.915	NA	S9359446	HMDB0032796	0	-0.0016	NA	NA	2	level4	Benzenoids	Benzene and substituted derivatives	Benzoic acids and derivatives	Benzene and derivatives
	6.286_288.1473	0.0847	0.0256	0.705	0.0813	0.603	1.6362	C18:pos	Imazamethabenz-methyl	C16 H20 N2 O3	288.147	6.286	C11494	S49450	HMDB0034913	-1e-04	-0.207	NA	NA	3	level4	Benzenoids	Benzene and substituted derivatives	Benzoic acids and derivatives	Benzene and derivatives
	0.751_382.1466	0.5095	0.0247	0.705	0.02	0.5327	1.05	C18:pos	Loratadine	C22 H23 Cl N2 O2	382.147	0.751	NA	S3820	HMDB0005000	0.0018	4.6262	NA	NA	2	level4	Organoheterocyclic compounds	Benzocycloheptapyridines	null	Pyridine and derivatives
	9.608_327.2772	0.2892	0.0238	0.705	0.0293	0.5368	1.4078	C18:pos	N-heptadecanoylglycine	C19 H37 N O3	327.277	9.608	NA	S16409604	HMDB0013246	-2e-04	-0.507	NA	NA	1	level4	Organic acids and derivatives	Carboxylic acids and derivatives	Amino acids, peptides, and analogues	Amino acids, peptides, and analogues
	8.801_254.2245	0.2588	0.008	0.6951	0.0047	0.5327	1.4751	C18:pos	Palmitoleic acid	C16 H30 O2	254.225	8.801	C08362	BGI461	HMDB0003229	0	-0.1414	96.8	96.6	24	level2	Lipids	Fatty acids [Fig]	Unsaturated fatty acids	Fatty acyls[FA]
	1.245_156.0536	0.4196	0.0299	0.705	0.0593	0.5712	1.2106	C18:pos	Pentoxyl	C6 H8 N2 O3	156.054	1.245	NA	S8635	HMDB0000544	1e-04	0.7799	NA	NA	7	level4	Organoheterocyclic compounds	Diazines	Pyrimidines and pyrimidine derivatives	Pyrimidines and pyrimidine derivatives
	9.303_516.3121	0.4008	0.0398	0.705	0.0593	0.5712	1.3049	C18:pos	Probucol	C31 H48 O2 S2	516.312	9.303	C07373	S4743	HMDB0015537	0.0026	4.9515	NA	NA	1	level4	Benzenoids	Benzene and substituted derivatives	Phenylpropanes	Benzene and derivatives
	4.281_525.2913	0.2431	0.0194	0.705	0.0127	0.5327	2.1333	C18:pos	Protoverine	C27 H43 N O9	525.291	4.281	C10817	S391285	NA	-0.0025	-4.7104	NA	NA	1	level4	Alkaloids	Alkaloids derived by amination reactions	Steroid alkaloids	Alkaloids
	4.798_407.1179	0.0179	0.0121	0.705	0.0293	0.5368	2.2538	C18:pos	Sitagliptin	C16 H15 F6 N5 O	407.118	4.798	D08516	MReference-1136	HMDB0015390	-2e-04	-0.4482	NA	97.3	1	level2	Organic acids and derivatives	Carboxylic acids and derivatives	Amino acids, peptides, and analogues	Amino acids, peptides, and analogues
	0.748_152.0473	0.0783	0.0479	0.705	0.0813	0.603	1.5824	C18:pos	Vanillin	C8 H8 O3	152.047	0.748	C00755	S13860434	HMDB0012308	-1e-04	-0.3633	23.5	NA	37	level4	Benzenoids	Phenols	Methoxyphenols	Phenols and derivatives
	4.837_432.1055	0.0097	0.0422	0.705	0.02	0.5327	1.6665	C18:pos	Vitexin	C21 H20 O10	432.106	4.837	C01460	MReference-6158	NA	-2e-04	-0.4405	NA	96.1	12	level2	Flavonoids	Flavonoids	Flavones	Flavonoids
Metabolites without class information increased in low handgrip strength group	10.223_332.2713	0.1243	0.0193	0.7089	0.0593	0.6399	1.4076	C18:neg	(7e,10e,13e,16e)-7,10,13,16-docosatetraenoic acid	C22 H36 O2	332.271	10.223	NA	S4445971	NA	-3e-04	-0.7997	NA	NA	11	level4	NA	NA	NA	NA
	10.273_356.2924	0.1039	0.0453	0.7089	0.0593	0.6399	1.3789	C18:neg	1-oleoyl-rac-glycerol	C21 H40 O4	356.292	10.273	NA	S4446588	NA	-2e-04	-0.6552	NA	NA	9	level4	NA	NA	NA	NA
	0.65_260.0198	0.2337	0.01	0.7089	0.0127	0.6399	1.2783	C18:neg	6-o-sulfo-alpha-d-galactopyranose	C6 H12 O9 S	260.02	0.65	C01067	S388504	NA	-4e-04	-1.502	NA	NA	3	level4	NA	NA	NA	NA
	8.38_554.2899	0.0797	0.0474	0.7089	0.0593	0.6399	1.5441	C18:neg	Acrovestone	C32 H42 O8	554.29	8.38	C09916	S140633	NA	0.002	3.5404	NA	NA	2	level4	NA	NA	NA	NA
	7.362_450.2073	0.0929	0.0289	0.7089	0.0593	0.6399	1.7186	C18:neg	Cediranib	C25 H27 F N4 O3	450.207	7.362	NA	S8109103	NA	6e-04	1.2661	NA	NA	1	level4	NA	NA	NA	NA
	0.701_128.0586	0.1371	0.0201	0.7089	0.0127	0.6399	1.3752	C18:neg	Dihydrothymine	C5 H8 N2 O2	128.059	0.701	C00906	S84456	NA	0	0.1132	NA	NA	6	level4	NA	NA	NA	NA
	6.122_401.1506	0.1083	0.0171	0.7089	0.0426	0.6399	1.5439	C18:neg	Fominoben	C21 H24 Cl N3 O3	401.151	6.122	NA	S3290	NA	0	0.0723	NA	NA	1	level4	NA	NA	NA	NA
	0.726_140.0585	0.0382	0.007	0.7089	0.0426	0.6399	1.9601	C18:neg	Gaboxadol	C6 H8 N2 O2	140.059	0.726	C13693	S3330	NA	-1e-04	-0.4682	NA	NA	5	level4	NA	NA	NA	NA
	6.046_378.2041	0.2919	0.0027	0.7089	0.0047	0.5877	1.3936	C18:neg	Mfcd00273304	C21 H30 O6	378.204	6.046	C15291	S223204	NA	-2e-04	-0.4072	NA	NA	9	level4	NA	NA	NA	NA
	0.728_158.0691	0.1023	0.048	0.7089	0.1419	0.685	1.325	C18:neg	Oxiracetam	C6 H10 N2 O3	158.069	0.728	NA	S4465	NA	-1e-04	-0.4527	NA	NA	4	level4	NA	NA	NA	NA
	7.068_421.086	0.019	0.0482	0.7089	0.0293	0.6399	1.3761	C18:neg	Piragliatin	C19 H20 Cl N3 O4 S	421.086	7.068	NA	S8607766	NA	-3e-04	-0.7669	NA	NA	1	level4	NA	NA	NA	NA
	0.692_402.137	0.2303	0.0444	0.7089	0.02	0.6399	1.0678	C18:neg	Setipiprant	C24 H19 F N2 O3	402.137	0.692	NA	S29738718	NA	-0.001	-2.3965	NA	NA	1	level4	NA	NA	NA	NA
	3.787_313.1078	0.1171	0.0237	0.705	0.02	0.5327	1.5853	C18:pos	(-)-salinosporamide a	C15 H20 Cl N O4	313.108	3.787	NA	S9522473	NA	-3e-04	-0.9935	NA	NA	1	level4	NA	NA	NA	NA
	3.278_303.1693	0.3687	0.0442	0.705	0.0426	0.563	1.1416	C18:pos	(4s)-4-[(6-carboxyhexanoyl)oxy]-4-(trimethylammonio)butanoate	C14 H25 N O6	303.169	3.278	NA	S30776712	NA	0.0011	3.5631	NA	NA	1	level4	NA	NA	NA	NA
	9.961_332.2714	0.1643	0.0102	0.705	0.02	0.5327	1.5645	C18:pos	(7e,10e,13e,16e)-7,10,13,16-docosatetraenoic acid	C22 H36 O2	332.271	9.961	NA	S4445971	NA	-1e-04	-0.3829	NA	NA	11	level4	NA	NA	NA	NA
	10.044_362.1904	0.3068	0.0124	0.705	0.02	0.5327	1.3187	C18:pos	17,21-epoxy-9-fluoro-11beta-hydroxyprogesterone	C21 H27 F O4	362.19	10.044	C15309	S210391	NA	0.0011	2.9168	NA	NA	1	level4	NA	NA	NA	NA
	4.805_217.0739	0.1823	0.0237	0.705	0.0293	0.5368	1.8444	C18:pos	3-(indol-3-yl)-2-oxobutyric acid	C12 H11 N O3	217.074	4.805	C05644	S389611	NA	0	0.1025	NA	NA	2	level4	NA	NA	NA	NA
	4.166_314.1629	0.1286	0.0153	0.705	0.02	0.5327	1.8316	C18:pos	5-(5-(4-(4,5-dihydro-2-oxazoly)phenoxy)pentyl)-3-methyl osoxazole	C18 H22 N2 O3	314.163	4.166	C06490	S1720	NA	-2e-04	-0.4872	NA	NA	1	level4	NA	NA	NA	NA
	3.821_358.0137	0.025	0.017	0.705	0.02	0.5327	1.9999	C18:pos	5352	C11 H17 Cl O7 P2	358.014	3.821	NA	S54883	NA	-1e-04	-0.2669	NA	NA	1	level4	NA	NA	NA	NA
	5.251_470.2739	0.0991	0.021	0.705	0.0293	0.5368	1.584	C18:pos	6-bromo-5,9-hexacosadienoic acid	C26 H47 Br O2	470.274	5.251	NA	S4472374	NA	-0.002	-4.3185	NA	NA	2	level4	NA	NA	NA	NA
	7.963_429.2877	0.0635	0.0258	0.705	0.0426	0.563	1.883	C18:pos	Adaprolol	C26 H39 N O4	429.288	7.963	NA	S54735	NA	-2e-04	-0.4953	NA	NA	1	level4	NA	NA	NA	NA
	4.746_385.2099	0.1438	0.008	0.6951	0.0047	0.5327	1.5692	C18:pos	Bamifylline	C20 H27 N5 O3	385.21	4.746	NA	S15401	NA	-0.0015	-3.9022	NA	NA	1	level4	NA	NA	NA	NA
	8.256_570.3529	0.0504	0.0204	0.705	0.0127	0.5327	1.9962	C18:pos	Carbenoxolone	C34 H50 O7	570.353	8.256	NA	S552190	NA	-0.0027	-4.7354	NA	NA	1	level4	NA	NA	NA	NA
	0.746_216.0632	0.2054	0.0297	0.705	0.0127	0.5327	1.5835	C18:pos	Cis-trihomoaconitic acid	C9 H12 O6	216.063	0.746	C20582	S28639106	NA	-2e-04	-0.8503	NA	NA	1	level4	NA	NA	NA	NA
	4.794_538.0603	0.0685	0.049	0.705	0.0593	0.5712	1.567	C18:pos	Difethialone	C31 H23 Br O2 S	538.06	4.794	C18695	S10469311	NA	1e-04	0.1414	NA	NA	1	level4	NA	NA	NA	NA
	4.118_329.1837	0.2556	0.0413	0.705	0.1079	0.6169	1.4342	C18:pos	Gabapentin enacarbil	C16 H27 N O6	329.184	4.118	NA	S8059607	NA	-2e-04	-0.5029	NA	NA	3	level4	NA	NA	NA	NA
	6.742_358.189	0.2027	0.0281	0.705	0.02	0.5327	1.4937	C18:pos	Itopride	C20 H26 N2 O4	358.189	6.742	NA	S3660	NA	-2e-04	-0.6613	NA	NA	2	level4	NA	NA	NA	NA
	0.699_114.0793	0.1761	0.028	0.705	0.0426	0.563	1.3785	C18:pos	L-prolinamide	C5 H10 N2 O	114.079	0.699	C19781	S99870	NA	0	0.021	NA	NA	4	level4	NA	NA	NA	NA
	1.606_190.0955	0.1868	0.0095	0.705	0.0027	0.4678	1.5105	C18:pos	Meso-2,6-diaminopimelic acid	C7 H14 N2 O4	190.095	1.606	C00680	S89700	NA	2e-04	0.9483	NA	NA	6	level4	NA	NA	NA	NA
	6.892_401.2776	0.0197	0.0462	0.705	0.0813	0.603	1.7265	C18:pos	Myriocin	C21 H39 N O6	401.278	6.892	C19914	S4942874	NA	-2e-04	-0.3984	NA	NA	1	level4	NA	NA	NA	NA
	8.094_391.2711	0.0784	0.0149	0.705	0.0127	0.5327	2.0824	C18:pos	N-arachidonoyl-l-serine	C23 H37 N O4	391.271	8.094	NA	MReference-4433	NA	-0.0011	-2.8318	NA	61.4	1	level2	NA	NA	NA	NA
	4.857_428.2422	0.0318	0.0217	0.705	0.0007	0.3995	1.6905	C18:pos	Nummularine f	C23 H32 N4 O4	428.242	4.857	C10011	S4444915	NA	-2e-04	-0.3521	NA	NA	1	level4	NA	NA	NA	NA
	6.815_269.2103	0.4574	0.0264	0.705	0.0293	0.5368	1.2137	C18:pos	Pramiracetam	C14 H27 N3 O2	269.21	6.815	NA	S46801	NA	0	-0.0494	NA	NA	1	level4	NA	NA	NA	NA
	5.916_382.2354	0.3653	0.0474	0.705	0.0593	0.5712	1.5074	C18:pos	Sarcostin	C21 H34 O6	382.235	5.916	C17770	S30791575	NA	-2e-04	-0.4457	NA	NA	1	level4	NA	NA	NA	NA
	0.713_422.0822	0.2839	0.028	0.705	0.0593	0.5712	1.2616	C18:pos	Sucrose 6'-phosphate	C12 H23 O14 P	422.082	0.713	C02591	S388819	NA	-4e-04	-0.8794	NA	NA	9	level4	NA	NA	NA	NA
	7.009_282.1619	0.1043	0.0162	0.705	0.0007	0.3995	1.898	C18:pos	Vedaprofen	C19 H22 O2	282.162	7.009	NA	S65131	NA	0	-0.1294	NA	NA	18	level4	NA	NA	NA	NA
Metabolites with class information decreased in low handgrip strength group	3.117_200.1048	2.7011	0.0157	0.7089	0.0426	0.6399	1.5206	C18:neg	(+/-)-camphoric acid	C10 H16 O4	200.105	3.117	NA	S20198	HMDB0034491	-1e-04	-0.3681	NA	NA	11	level4	Organic acids and derivatives	Carboxylic acids and derivatives	Dicarboxylic acids and derivatives	Organic acids
	6.346_361.116	5.2747	0.0095	0.7089	0.02	0.6399	1.9989	C18:neg	(2e)-n-[2-(dihydroxymethyl)-4-hydroxy-5-methoxyphenyl]-3-(4-hydroxy-3-methoxyphenyl)acrylamide	C18 H19 N O7	361.116	6.346	NA	S30776766	HMDB0029297	-2e-04	-0.4962	NA	NA	1	level4	Phenylpropanoids and polyketides	Cinnamic acids and derivatives	Hydroxycinnamic acids and derivatives	Polyketides[PK]
	3.645_284.1621	2.8837	0.0364	0.7089	0.0593	0.6399	1.513	C18:neg	(4r,5s,9s,10r,12s,13s)-1,5,9-trimethyl-11,14,15,16-tetraoxatetracyclo[10.3.1.0~4,13~.0~8,13~]hexadecan-10-ol	C15 H24 O5	284.162	3.645	NA	S35031843	HMDB0061088	-3e-04	-1.0693	NA	NA	1	level4	Organic oxygen compounds	Organooxygen compounds	Carbohydrates and carbohydrate conjugates	Carbohydrates
	3.874_348.1208	11.3949	0.0128	0.7089	0.02	0.6399	2.0097	C18:neg	1-(2,4,6-trihydroxyphenyl)-3-(3,4,5-trimethoxyphenyl)-1-propanone	C18 H20 O7	348.121	3.874	NA	S24826779	HMDB0124870	-1e-04	-0.3772	NA	NA	2	level4	Phenylpropanoids and polyketides	Linear 1,3-diarylpropanoids	Chalcones and dihydrochalcones	Polyketides[PK]
	6.037_225.1363	6.261	0.0304	0.7089	0.0426	0.6399	1.5973	C18:neg	2616	C12 H19 N O3	225.136	6.037	C07129	S5210	HMDB0015009	-2e-04	-0.6889	NA	NA	3	level4	Benzenoids	Phenols	Benzenediols	Phenols and derivatives
	3.394_268.0579	14.4162	0.0001	0.2229	0.0007	0.4702	2.4241	C18:neg	3-(6,7-dimethoxy-1,3-benzodioxol-5-yl)-2-oxiranecarboxylic acid	C12 H12 O7	268.058	3.394	NA	S74852310	HMDB0128678	-4e-04	-1.3682	NA	41.5	2	level4	Organoheterocyclic compounds	Benzodioxoles	null	Benzodioxoles
	4.275_150.068	8.5866	0.0096	0.7089	0.02	0.6399	2.0163	C18:neg	3,4-dimethylbenzoic acid	C9 H10 O2	150.068	4.275	NA	MReference-2597	HMDB0002237	-1e-04	-0.6192	NA	59.2	35	level3	Benzenoids	Benzene and substituted derivatives	Benzoic acids and derivatives	Benzene and derivatives
	8.884_352.1919	5.3	0.0177	0.7089	0.02	0.6399	1.6229	C18:neg	3-[2-hydroxy(diphenyl)acetoxy]-1-methyl-1-azoniabicyclo[2.2.2]octane	C22 H26 N O3	352.192	8.884	C07853	S2682	HMDB0014909	6e-04	1.8155	NA	NA	2	level4	Benzenoids	Benzene and substituted derivatives	Diphenylmethanes	Benzene and derivatives
	1.631_108.0575	17.5088	0.0108	0.7089	0.008	0.6399	2.1766	C18:neg	4-methylphenol	C7 H8 O	108.058	1.631	C01468	MReference-3199	HMDB0001858	0	0.2101	NA	82	5	level2	Benzenoids	Phenols	Cresols	Phenols and derivatives
	4.653_242.1516	38.5975	0.0232	0.7089	0.0127	0.6399	2.1442	C18:neg	5-octyl-2-oxotetrahydro-3-furancarboxylic acid	C13 H22 O4	242.152	4.653	NA	S35013298	HMDB0030987	-2e-04	-0.9114	NA	NA	2	level4	Organoheterocyclic compounds	Lactones	Gamma butyrolactones	Gamma butyrolactones
	5.814_336.2047	4.9795	0.0284	0.7089	0.0813	0.6563	1.9461	C18:neg	Acebutolol	C18 H28 N2 O4	336.205	5.814	C06803	S1901	HMDB0015324	-2e-04	-0.5735	NA	NA	1	level4	Organic oxygen compounds	Organooxygen compounds	Carbonyl compounds	Carbonyl compounds
	5.592_290.1991	2.7327	0.0295	0.7089	0.1079	0.685	1.7865	C18:neg	D-617	C17 H26 N2 O2	290.199	5.592	NA	S84112	HMDB0013962	-3e-04	-1.0953	NA	NA	5	level4	Benzenoids	Benzene and substituted derivatives	Phenylbutylamines	Amines and derivatives
	5.925_228.042	10.2863	0.0458	0.7089	0.0593	0.6399	1.836	C18:neg	Euxanthone	C13 H8 O4	228.042	5.925	C10061	S4444950	HMDB0030724	-2e-04	-0.9814	NA	NA	6	level4	Organoheterocyclic compounds	Benzopyrans	1-benzopyrans	1-benzopyrans
	0.726_141.0901	2.515	0.0109	0.7089	0.0293	0.6399	1.3705	C18:neg	Histidinol	C6 H11 N3 O	141.09	0.726	C00860	S144886	HMDB0003431	-1e-04	-0.4594	NA	NA	1	level4	Organic nitrogen compounds	Organonitrogen compounds	Amines	Amines
	1.095_136.0385	2.527	0.003	0.7089	0.0047	0.5877	1.2572	C18:neg	Hypoxanthine	C5 H4 N4 O	136.038	1.095	C00262	BGI318	HMDB0000157	0	-0.1469	97.8	95.3	3	level1	Alkaloids	Others	Purine alkaloids	Alkaloids
	3.412_328.0945	2.4777	0.0398	0.7089	0.1079	0.685	2.0044	C18:neg	In00150	C18 H16 O6	328.094	3.412	NA	S141666	HMDB0128577	-2e-04	-0.5647	NA	NA	27	level4	Phenylpropanoids and polyketides	Flavonoids	O-methylated flavonoids	Flavonoids
	4.983_161.0476	8.8178	0.0025	0.7089	0.008	0.6399	2.0023	C18:neg	Indole-2-carboxylic acid	C9 H7 N O2	161.048	4.983	NA	MReference-1302	HMDB0002285	0	-0.2255	NA	71.5	8	level2	Organoheterocyclic compounds	Indoles and derivatives	Indolecarboxylic acids and derivatives	Indole and derivatives
	1.724_268.0804	3.2547	0.0066	0.7089	0.0127	0.6399	1.7296	C18:neg	Inosine	C10 H12 N4 O5	268.08	1.724	C00294	BGI328	HMDB0000195	-4e-04	-1.4001	42.5	NA	9	level3	Nucleosides, nucleotides, and analogues	Purine nucleosides	null	Purines and derivatives
	3.644_185.1052	3.3636	0.0499	0.7089	0.0593	0.6399	1.6876	C18:neg	Otonecine	C9 H15 N O3	185.105	3.644	C10356	S4445054	NA	0	-0.2518	NA	NA	8	level4	Alkaloids	Alkaloids derived from ornithine	Pyrrolizidine alkaloids	Alkaloids
	0.712_205.1312	3.9762	0.0457	0.7089	0.0593	0.6399	1.3525	C18:neg	Panthenol	C9 H19 N O4	205.131	0.712	C05944	S4516	HMDB0004231	-2e-04	-0.8599	NA	NA	2	level4	Organic oxygen compounds	Organooxygen compounds	Alcohols and polyols	Alcohols
	6.345_412.1132	5.4071	0.0129	0.7089	0.02	0.6399	1.8839	C18:neg	Ziprasidone	C21 H21 Cl N4 O S	412.113	6.345	C07568	S54841	HMDB0014391	7e-04	1.7144	NA	NA	1	level4	Organoheterocyclic compounds	Diazinanes	Piperazines	Piperazines
	5.062_264.115	2.9084	0.0422	0.705	0.0813	0.603	1.8074	C18:pos	(2e)-3-phenyl-2-propen-1-yl (2z)-3-phenylacrylate	C18 H16 O2	264.115	5.062	NA	S1267365	HMDB0033832	-1e-04	-0.2003	NA	NA	1	level4	Phenylpropanoids and polyketides	Cinnamic acids and derivatives	Cinnamic acid esters	Polyketides[PK]
	7.177_210.0529	2.227	0.0307	0.705	0.0813	0.603	1.2667	C18:pos	(2e)-5-hydroxyferulic acid	C10 H10 O5	210.053	7.177	C05619	S394087	HMDB0035484	1e-04	0.3844	NA	NA	13	level4	Phenylpropanoids and polyketides	Cinnamic acids and derivatives	Hydroxycinnamic acids and derivatives	Polyketides[PK]
	7.298_236.16	9.6379	0.0404	0.705	0.02	0.5327	1.6955	C18:pos	(3z,7z)-1,5,5,8-tetramethyl-12-thiabicyclo[9.1.0]dodeca-3,7-diene	C15 H24 S	236.16	7.298	NA	S35014153	HMDB0036468	1e-04	0.503	NA	NA	3	level4	Organoheterocyclic compounds	Thiiranes	null	Thiiranes
	5.334_300.1361	3.7963	0.0224	0.705	0.02	0.5327	1.5834	C18:pos	1-(2,4-dihydroxy-6-methoxy-3,5-dimethylphenyl)-3-phenyl-1-propanone	C18 H20 O4	300.136	5.334	NA	S115957	HMDB0126599	0	-0.1377	NA	NA	10	level4	Phenylpropanoids and polyketides	Linear 1,3-diarylpropanoids	Chalcones and dihydrochalcones	Polyketides[PK]
	4.868_222.1256	5.953	0.0187	0.705	0.02	0.5327	1.8787	C18:pos	2453103	C13 H18 O3	222.126	4.868	NA	S21212	HMDB0061943	0	0.2176	NA	NA	14	level4	Benzenoids	Benzene and substituted derivatives	Benzoic acids and derivatives	Benzene and derivatives
	4.906_180.1151	4.3797	0.0139	0.705	0.0127	0.5327	1.8166	C18:pos	3-bha	C11 H16 O2	180.115	4.906	NA	S8145	HMDB0059925	1e-04	0.5901	NA	NA	12	level4	Benzenoids	Phenols	Methoxyphenols	Phenols and derivatives
	3.124_147.105	3.1138	0.048	0.705	0.0593	0.5712	1.5487	C18:pos	3-methyl-3-phenylazetidine	C10 H13 N	147.105	3.124	NA	S20888	HMDB0061785	1e-04	1.0112	NA	NA	4	level4	Organoheterocyclic compounds	Azetidines	Phenylazetidines	Phenylazetidines
	6.079_234.0205	4.3922	0.0414	0.705	0.0293	0.5368	1.5194	C18:pos	4-ethyl-2,6-dihydroxyphenyl hydrogen sulfate	C8 H10 O6 S	234.02	6.079	NA	S74852096	HMDB0128030	7e-04	3.1152	NA	NA	1	level4	Organic acids and derivatives	Organic sulfuric acids and derivatives	Arylsulfates	Organic acids
	1.093_252.1475	3.167	0.0344	0.705	0.02	0.5327	1.4243	C18:pos	5-allyl-5-sec-butyl-1,3-dimethyl-2,4,6(1h,3h,5h)-pyrimidinetrione	C13 H20 N2 O3	252.148	1.093	NA	S527603	HMDB0014451	1e-04	0.5211	NA	NA	2	level4	Organoheterocyclic compounds	Diazines	Pyrimidines and pyrimidine derivatives	Pyrimidines and pyrimidine derivatives
	0.623_130.1219	2.0503	0.0425	0.705	0.1419	0.6347	1.274	C18:pos	Agmatine	C5 H14 N4	130.122	0.623	C00179	MReference-303	HMDB0001432	1e-04	0.6788	41.6	42.2	1	level3	Organic nitrogen compounds	Organonitrogen compounds	Guanidines	Guanidines
	5.092_293.1627	1.798	0.0484	0.705	0.0426	0.563	1.0589	C18:pos	Anastrozole	C17 H19 N5	293.163	5.092	C08159	S2102	HMDB0015348	-0.0013	-4.5684	NA	NA	2	level4	Benzenoids	Benzene and substituted derivatives	Phenylpropanes	Benzene and derivatives
	6.055_618.2684	2.1594	0.0261	0.705	0.0293	0.5368	1.1543	C18:pos	Apc	C33 H38 N4 O8	618.268	6.055	C16542	S8253122	HMDB0060661	-5e-04	-0.8811	NA	NA	1	level4	Organic oxygen compounds	Organooxygen compounds	Carbonyl compounds	Carbonyl compounds
	2.959_122.0369	4.067	0.0281	0.705	0.0293	0.5368	1.6515	C18:pos	Benzoic acid	C7 H6 O2	122.037	2.959	C00180	S238	HMDB0001870	1e-04	0.8434	NA	NA	6	level4	Benzenoids	Benzene and substituted derivatives	Benzoic acids and derivatives	Benzene and derivatives
	0.732_212.1161	1.94	0.0481	0.705	0.1419	0.6347	1.0027	C18:pos	Butabarbital	C10 H16 N2 O3	212.116	0.732	C07827	S2385	HMDB0014382	0	-0.2211	NA	NA	3	level4	Organoheterocyclic compounds	Diazines	Pyrimidines and pyrimidine derivatives	Pyrimidines and pyrimidine derivatives
	7.417_302.2093	6.4506	0.0094	0.705	0.0127	0.5327	1.9151	C18:pos	Emedastine	C17 H26 N4 O	302.209	7.417	C07785	S3106	HMDB0015216	-0.0014	-4.5828	NA	NA	3	level4	Organoheterocyclic compounds	Benzimidazoles	null	Imidazole and derivatives
	0.726_275.1116	1.8317	0.0197	0.705	0.0293	0.5368	1.0895	C18:pos	Gamma-glu-gln	C10 H17 N3 O6	275.112	0.726	C05283	S133013	HMDB0011738	-2e-04	-0.6314	NA	NA	6	level4	Organic acids and derivatives	Carboxylic acids and derivatives	Amino acids, peptides, and analogues	Amino acids, peptides, and analogues
	0.957_172.0848	7.1733	0.0221	0.705	0.0293	0.5368	1.7113	C18:pos	Glycylproline	C7 H12 N2 O3	172.085	0.957	NA	MReference-432	HMDB0000721	0	-0.0294	52.1	45	2	level3	Organic acids and derivatives	Carboxylic acids and derivatives	Amino acids, peptides, and analogues	Amino acids, peptides, and analogues
	5.044_196.1101	2.7989	0.0096	0.705	0.008	0.5327	1.5379	C18:pos	Hexyl 2-furoate	C11 H16 O3	196.11	5.044	NA	S55834	HMDB0037725	2e-04	0.773	NA	NA	4	level4	Organoheterocyclic compounds	Furans	Furoic acid and derivatives	Furoic acid and derivatives
	4.652_302.1379	2.4885	0.0334	0.705	0.0426	0.563	1.092	C18:pos	Histidylphenylalanine	C15 H18 N4 O3	302.138	4.652	NA	S3664633	HMDB0028892	0	0.017	NA	NA	3	level4	Organic acids and derivatives	Carboxylic acids and derivatives	Amino acids, peptides, and analogues	Amino acids, peptides, and analogues
	5.299_176.0475	5.0949	0.0194	0.705	0.02	0.5327	1.6204	C18:pos	Hymecromone	C10 H8 O3	176.048	5.299	C03081	S4444190	HMDB0059622	1e-04	0.6868	40.3	NA	12	level4	Phenylpropanoids and polyketides	Coumarins and derivatives	Hydroxycoumarins	Coumarins and derivatives
	7.414_266.1882	6.6654	0.007	0.6951	0.0127	0.5327	1.9738	C18:pos	Juvenile hormone iii	C16 H26 O3	266.188	7.414	C09694	S4444856	NA	0	-0.0366	NA	NA	12	level4	Terpenoids	Sesquiterpenoids (C15)	Farnesenes	Terpenoids
	0.7_224.0795	1.8458	0.0352	0.705	0.0813	0.603	1.0216	C18:pos	L-3-hydroxykynurenine	C10 H12 N2 O4	224.079	0.7	C03227	S11318	HMDB0011631	-2e-04	-0.9222	NA	NA	6	level4	Organic oxygen compounds	Organooxygen compounds	Carbonyl compounds	Carbonyl compounds
	5.238_317.1739	4.1092	0.0344	0.705	0.1079	0.6169	1.8493	C18:pos	Leucyltryptophan	C17 H23 N3 O3	317.174	5.238	NA	S291664	HMDB0028940	0	-0.0767	NA	NA	4	level4	Organic acids and derivatives	Carboxylic acids and derivatives	Amino acids, peptides, and analogues	Amino acids, peptides, and analogues
	4.783_204.0788	4.4606	0.0297	0.705	0.008	0.5327	1.6158	C18:pos	Maraniol	C12 H12 O3	204.079	4.783	NA	S59963	HMDB0035095	1e-04	0.505	NA	NA	3	level4	Phenylpropanoids and polyketides	Coumarins and derivatives	null	Coumarins and derivatives
	8.303_430.2485	3.3121	0.0344	0.705	0.0293	0.5368	1.5657	C18:pos	Mavik	C24 H34 N2 O5	430.248	8.303	NA	S4588590	HMDB0014660	0.0017	4.0667	NA	NA	1	level4	Organic acids and derivatives	Carboxylic acids and derivatives	Amino acids, peptides, and analogues	Amino acids, peptides, and analogues
	5.676_224.1413	34.4612	0.0182	0.705	0.02	0.5327	2.4568	C18:pos	Methyl jasmonate	C13 H20 O3	224.141	5.676	C11512	BGI403	HMDB0036583	0	0.0737	6.3	NA	14	level3	FA Fatty acyls	FA02 Octadecanoids	FA0202 jasmonic acids	Fatty acyls[FA]
	10.127_218.1672	3.0615	0.0048	0.6775	0.008	0.5327	1.6876	C18:pos	Nootkatone	C15 H22 O	218.167	10.127	C17914	MReference-842	HMDB0013687	1e-04	0.4174	NA	72.4	49	level2	Lipids and lipid-like molecules	Prenol lipids	Sesquiterpenoids	Terpenoids
	6.08_356.1205	2.6238	0.0363	0.705	0.0293	0.5368	1.4249	C18:pos	Pioglitazone	C19 H20 N2 O3 S	356.12	6.08	C07675	S4663	HMDB0015264	0.001	2.8273	NA	NA	2	level4	Benzenoids	Phenol ethers	null	Benzene and derivatives
	0.74_159.1259	3.56	0.0094	0.705	0.02	0.5327	2.1726	C18:pos	Pregabalin	C8 H17 N O2	159.126	0.74	NA	S4589156	HMDB0014375	-1e-04	-0.4363	NA	NA	3	level4	Organic acids and derivatives	Carboxylic acids and derivatives	Amino acids, peptides, and analogues	Amino acids, peptides, and analogues
	0.719_332.1583	1.8457	0.0297	0.705	0.1079	0.6169	1.1411	C18:pos	Spectinomycin	C14 H24 N2 O7	332.158	0.719	C02078	S14785	HMDB0015055	0	-0.0207	NA	NA	1	level4	Organoheterocyclic compounds	Dioxanes	1,4-dioxanes	1,4-dioxanes
	5.987_592.3255	1.9481	0.0433	0.705	0.1419	0.6347	2.0971	C18:pos	Urobilinogen	C33 H44 N4 O6	592.326	5.987	C05790	S24980	HMDB0001898	-6e-04	-0.9763	NA	NA	1	level4	Organoheterocyclic compounds	Tetrapyrroles and derivatives	Bilirubins	Bilirubins
	5.045_241.1678	2.3373	0.0262	0.705	0.0293	0.5368	1.3114	C18:pos	Valeroidine	C13 H23 N O3	241.168	5.045	C10869	S391313	NA	0	0.1015	NA	NA	2	level4	Alkaloids	Alkaloids derived from ornithine	Tropane alkaloids	Alkaloids
	5.001_277.2042	3.9645	0.0077	0.6951	0.02	0.5327	1.6345	C18:pos	Venlafaxine	C17 H27 N O2	277.204	5.001	C07187	S5454	HMDB0005016	0	0.1125	NA	NA	3	level4	Benzenoids	Phenol ethers	Anisoles	Benzene and derivatives
Metabolites without class information decreased in low handgrip strength group	7.579_396.251	2.2698	0.0278	0.7089	0.0593	0.6399	1.0943	C18:neg	(5z,9alpha,11alpha,13e,15s)-11-acetoxy-9,15-dihydroxyprosta-5,13-dien-1-oic acid	C22 H36 O6	396.251	7.579	NA	S4446214	NA	-2e-04	-0.5014	NA	NA	2	level4	NA	NA	NA	NA
	8.927_552.4015	5.7392	0.0482	0.7089	0.0426	0.6399	1.435	C18:neg	(7r)-7-acetoxy-4-hydroxy-n,n,n-trimethyl-3,5,9-trioxa-4-phosphaheptacosan-1-aminium 4-oxide	C28 H59 N O7 P	552.402	8.927	NA	S2015322	NA	-0.0014	-2.517	NA	NA	1	level4	NA	NA	NA	NA
	6.028_300.1934	10.6692	0.0092	0.7089	0.008	0.6399	1.9174	C18:neg	13,14-dihydro-15-keto-tetranor prostaglandin f1α	C16 H28 O5	300.193	6.028	NA	MReference-9880	NA	-2e-04	-0.7684	NA	78.6	0	level2	NA	NA	NA	NA
	0.728_258.1576	2.3332	0.0271	0.7089	0.0293	0.6399	1.1085	C18:neg	2949	C12 H22 N2 O4	258.158	0.728	NA	S29962	NA	-3e-04	-1.2408	NA	NA	1	level4	NA	NA	NA	NA
	8.676_316.2611	2.5578	0.0273	0.7089	0.0593	0.6399	1.3222	C18:neg	9,10-dihydroxystearic acid	C18 H36 O4	316.261	8.676	C19622	S80658	NA	-2e-04	-0.7516	NA	NA	22	level4	NA	NA	NA	NA
	6.345_298.1203	5.9657	0.0148	0.7089	0.02	0.6399	2.0766	C18:neg	Benzyl succinate	C18 H18 O4	298.12	6.345	C07332	S7370	NA	-2e-04	-0.7609	NA	NA	9	level4	NA	NA	NA	NA
	4.66_386.1939	1.6636	0.0244	0.7089	0.02	0.6399	1.5739	C18:neg	Bevenopran	C20 H26 N4 O4	386.194	4.66	NA	S8628148	NA	-0.0015	-3.9476	NA	NA	1	level4	NA	NA	NA	NA
	5.216_350.184	2.899	0.0332	0.7089	0.0593	0.6399	1.7129	C18:neg	Disofenin	C18 H26 N2 O5	350.184	5.216	NA	S150080	NA	-2e-04	-0.5264	NA	NA	1	level4	NA	NA	NA	NA
	6.164_259.1204	6.639	0.0208	0.7089	0.02	0.6399	1.6909	C18:neg	Ilepcimide	C15 H17 N O3	259.12	6.164	NA	S556435	NA	-4e-04	-1.6904	NA	NA	4	level4	NA	NA	NA	NA
	5_388.2095	2.9343	0.0106	0.7089	0.008	0.6399	1.6698	C18:neg	Ilomastat	C20 H28 N4 O4	388.209	5	NA	S117009	NA	-0.0015	-3.9744	NA	NA	6	level4	NA	NA	NA	NA
	0.703_310.1372	5.2142	0.0101	0.7089	0.0127	0.6399	1.6927	C18:neg	Mannopine	C11 H22 N2 O8	310.137	0.703	C16692	S108717	NA	-4e-04	-1.1752	NA	NA	1	level4	NA	NA	NA	NA
	5.147_262.1677	2.9239	0.0373	0.7089	0.0593	0.6399	2.0133	C18:neg	Mepindolol	C15 H22 N2 O2	262.168	5.147	NA	S64750	NA	-4e-04	-1.5616	NA	NA	4	level4	NA	NA	NA	NA
	5.246_272.1984	7.4961	0.0474	0.7089	0.0426	0.6399	1.9136	C18:neg	Pentadecanedioic acid	C15 H28 O4	272.198	5.246	NA	S141102	NA	-4e-04	-1.3789	NA	NA	4	level4	NA	NA	NA	NA
	5.242_273.0997	2.5953	0.0013	0.6377	0.0007	0.4702	1.3158	C18:neg	Thyronine	C15 H15 N O4	273.1	5.242	NA	S92619	NA	-4e-04	-1.3695	NA	NA	3	level4	NA	NA	NA	NA
	7.412_284.1987	6.2023	0.0075	0.6951	0.0127	0.5327	1.9236	C18:pos	(10s)-juvenile hormone iii diol	C16 H28 O4	284.199	7.412	C16505	S9034333	NA	-1e-04	-0.1907	NA	NA	1	level4	NA	NA	NA	NA
	9.279_460.318	2.8589	0.04	0.705	0.0593	0.5712	1.2265	C18:pos	(1s,3r,5z,7e,22e)-9,10-secoergosta-5,7,10,22-tetraene-1,3,24,25,28-pentol	C28 H44 O5	460.318	9.279	NA	S7826196	NA	-8e-04	-1.8395	NA	NA	3	level4	NA	NA	NA	NA
	9.591_500.3865	2.2727	0.0262	0.705	0.0426	0.563	1.2041	C18:pos	(3beta)-7,11-dioxolanostan-3-yl acetate	C32 H52 O4	500.387	9.591	C15379	S211830	NA	-1e-04	-0.201	NA	NA	1	level4	NA	NA	NA	NA
	5.299_216.0399	4.9762	0.0402	0.705	0.0127	0.5327	1.3336	C18:pos	2-c-methylerythritol 4-phosphate	C5 H13 O7 P	216.04	5.299	C11434	S391470	NA	0	0.1375	63.4	41.2	1	level4	NA	NA	NA	NA
	9.549_314.2821	4.6946	0.0043	0.6775	0.0047	0.5327	1.7803	C18:pos	2-hydroxynonadecanoic acid	C19 H38 O3	314.282	9.549	NA	S4446043	NA	0	-0.1163	NA	NA	2	level4	NA	NA	NA	NA
	6.08_338.0831	10.9663	0.0273	0.705	0.0293	0.5368	1.9289	C18:pos	7042400	C19 H15 Cl N2 O2	338.083	6.08	C10942	S83423	NA	9e-04	2.583	NA	NA	1	level4	NA	NA	NA	NA
	6.072_425.1982	3.7228	0.0108	0.705	0.0127	0.5327	2.1602	C18:pos	Aleplasinin	C28 H27 N O3	425.198	6.072	NA	S8399758	NA	-9e-04	-2.0411	NA	NA	1	level4	NA	NA	NA	NA
	0.738_245.1011	2.0689	0.0387	0.705	0.0293	0.5368	1.2119	C18:pos	Asparaginyl-4-hydroxyproline	C9 H15 N3 O5	245.101	0.738	NA	S35032789	NA	-1e-04	-0.3	NA	NA	2	level4	NA	NA	NA	NA
	6.232_357.1422	6.3313	0.0139	0.705	0.008	0.5327	2.1272	C18:pos	Bacancosin	C16 H23 N O8	357.142	6.232	C09914	S390932	NA	-1e-04	-0.385	NA	NA	1	level4	NA	NA	NA	NA
	6.11_316.0947	2.3467	0.0215	0.705	0.0293	0.5368	1.1206	C18:pos	Byakangelicol	C17 H16 O6	316.095	6.11	C16925	S2316728	NA	0	0.0792	NA	NA	44	level4	NA	NA	NA	NA
	6.214_360.1783	3.7535	0.0434	0.705	0.0593	0.5712	1.4247	C18:pos	Carbazeran	C18 H24 N4 O4	360.178	6.214	NA	S64985	NA	-0.0015	-4.1187	NA	NA	1	level4	NA	NA	NA	NA
	0.74_290.2202	15.3423	0.0155	0.705	0.0127	0.5327	2.0909	C18:pos	Deoxycarnitine	C7 H15 N O2	290.22	0.74	C01181	BGI214	NA	145.1099	999997.7089	13.5	NA	1	level3	NA	NA	NA	NA
	4.873_203.1172	3.3836	0.0056	0.6775	0.0027	0.4678	1.6041	C18:pos	Enadenine	C10 H13 N5	203.117	4.873	C04083	S83222	NA	1e-04	0.5907	NA	NA	2	level4	NA	NA	NA	NA
	4.94_218.0944	1.8651	0.0305	0.705	0.0426	0.563	1.2032	C18:pos	Eupatoriochromene	C13 H14 O3	218.094	4.94	C09006	S91049	NA	1e-04	0.5214	NA	NA	4	level4	NA	NA	NA	NA
	6.995_591.3135	1.9754	0.0432	0.705	0.0593	0.5712	1.6511	C18:pos	Fluphenazine depot	C32 H44 F3 N3 O2 S	591.313	6.995	C07956	S3271	NA	0.0029	4.8897	NA	NA	1	level4	NA	NA	NA	NA
	0.72_182.0791	2.1208	0.0216	0.705	0.0293	0.5368	1.3403	C18:pos	Hexitol	C6 H14 O6	182.079	0.72	NA	S440	NA	1e-04	0.5208	NA	NA	7	level4	NA	NA	NA	NA
	0.747_233.1264	2.1862	0.006	0.691	0.0047	0.5327	1.2811	C18:pos	Hopantenic acid	C10 H19 N O5	233.126	0.747	NA	S26309	NA	0	0.1136	NA	NA	2	level4	NA	NA	NA	NA
	5.145_193.1104	2.8156	0.0418	0.705	0.0593	0.5712	1.8597	C18:pos	Mdma	C11 H15 N O2	193.11	5.145	C07577	S1556	NA	2e-04	0.8198	NA	NA	13	level4	NA	NA	NA	NA
	9.548_296.2715	5.7751	0.0035	0.6775	0.0047	0.5327	1.9013	C18:pos	Methyl (9e)-9-octadecenoate	C19 H36 O2	296.272	9.548	NA	S4444205	NA	-1e-04	-0.2784	NA	NA	13	level4	NA	NA	NA	NA
	3.578_295.128	1.8464	0.0396	0.705	0.0813	0.603	1.7277	C18:pos	N,n-dimethyladenosine	C12 H17 N5 O4	295.128	3.578	C03416	S389022	NA	0	-0.1563	NA	NA	1	level4	NA	NA	NA	NA
	9.982_618.606	2.2983	0.0071	0.6951	0.02	0.5327	1.3993	C18:pos	Oleoyl ethylamide	C20 H39 N O	618.606	9.982	NA	MReference-4424	NA	309.3028	999998.9488	NA	79.2	0	level2	NA	NA	NA	NA
	5.919_335.137	3.2869	0.0383	0.705	0.0293	0.5368	1.6556	C18:pos	Panadiplon	C18 H17 N5 O2	335.137	5.919	NA	S2298411	NA	-0.0012	-3.7141	NA	NA	1	level4	NA	NA	NA	NA
	6.079_354.0552	9.2271	0.0276	0.705	0.0127	0.5327	1.8659	C18:pos	Phenol red	C19 H14 O5 S	354.055	6.079	C12600	S4602	NA	-0.001	-2.7168	NA	NA	2	level4	NA	NA	NA	NA
	9.986_592.2683	4.0774	0.0182	0.705	0.02	0.5327	1.7822	C18:pos	Pheophorbide a	C35 H36 N4 O5	592.268	9.986	C18021	S10343120	NA	-3e-04	-0.4734	NA	NA	3	level4	NA	NA	NA	NA
	6.663_464.2158	5.8367	0.0072	0.6951	0.0047	0.5327	1.929	C18:pos	Rhizocticin c	C17 H33 N6 O7 P	464.216	6.663	C17960	S30791549	NA	0.001	2.1621	NA	NA	3	level4	NA	NA	NA	NA
	0.748_185.0798	1.8126	0.0335	0.705	0.02	0.5327	1.1625	C18:pos	Secnidazole	C7 H11 N3 O3	185.08	0.748	NA	S64839	NA	-2e-04	-1.1176	NA	NA	2	level4	NA	NA	NA	NA
	0.712_219.0854	2.0628	0.0297	0.705	0.0426	0.563	1.5173	C18:pos	Ser-asn	C7 H13 N3 O5	219.085	0.712	NA	S16568371	NA	-1e-04	-0.3992	NA	NA	4	level4	NA	NA	NA	NA
	0.737_377.1676	2.4884	0.018	0.705	0.0293	0.5368	1.1987	C18:pos	Talarozole	C21 H23 N5 S	377.168	0.737	NA	S7975653	NA	2e-04	0.5923	NA	NA	1	level4	NA	NA	NA	NA
	6.463_383.2305	1.7731	0.0186	0.705	0.0593	0.5712	1.1097	C18:pos	Tandospirone	C21 H29 N5 O2	383.231	6.463	NA	S82421	NA	-0.0016	-4.1978	NA	NA	1	level4	NA	NA	NA	NA
	9.109_475.2699	4.6917	0.036	0.705	0.0426	0.563	2.0294	C18:pos	Ulipristal acetate	C30 H37 N O4	475.27	9.109	NA	S115762	NA	-0.0023	-4.8677	NA	NA	5	level4	NA	NA	NA	NA
	0.941_273.18	2.1759	0.021	0.705	0.0293	0.5368	1.2269	C18:pos	Val-arg	C11 H23 N5 O3	273.18	0.941	NA	S3474098	NA	-1e-04	-0.4036	NA	NA	2	level4	NA	NA	NA	NA
